# Supplementary material for: A multiple mode integrated biosensor based on higher order Fano metamaterials
Source: Royal Society of Chemistry journal article supplement (doi:10.1039/c9nr07777d), 2019-12-04
Supplement: c9nr07777d1.pdf [file c9nr07777d1.pdf]

Supplementary Information for

## Multiple modes integrated biosensor based on higher order fano metamaterials

Xin Yan<sup>a,1</sup>, Zhang Zhang<sup>c,1</sup>, Lanju Liang<sup>a</sup>, Maosheng Yang<sup>\*b</sup>, Dequan Wei<sup>a</sup>, Xiaoxian Song<sup>b</sup>, Haiting Zhang<sup>b</sup>, Yuying Lu<sup>c</sup>, Longhai Liu<sup>e</sup>, Mengjin Zhang<sup>d</sup>, Tao Wang<sup>d</sup>, Jianquan Yao<sup>c</sup>

<sup>a</sup>School of Opto-electronic Engineering, Zaozhuang University, Zaozhuang 277160, China

<sup>b</sup>School of Mechanical Engineering Jiangsu University, Zhenjiang 225009, china

<sup>c</sup>College of Precision Instrument and Opto-electronics Engineering, Tianjin University, Tianjin 300072, China

<sup>d</sup>Department of Medical Oncology, Zaozhuang Municipal Hospital, Zaozhuang 277102, China

<sup>e</sup>Advantest (China) Co., Ltd.

\*To whom correspondence should be addressed. Email address: [2111803010@stmail.uj.edu.cn](mailto:2111803010@stmail.uj.edu.cn)

<sup>1</sup> contributed equally to this work.

### This file includes:

#### 1) Supplementary Table S1- S3.

**Supplementary Table S1.** ANOVA results for the effect of x-polarized order modes and cells concentration on the measured responses of  $\Delta f$  (GHz).

| Variable       | Treatment (cells/ml)  |                        |                        |                        |                         |                         |
|----------------|-----------------------|------------------------|------------------------|------------------------|-------------------------|-------------------------|
|                | 1×10 <sup>4</sup>     | 3×10 <sup>4</sup>      | 5×10 <sup>4</sup>      | 1×10 <sup>5</sup>      | 3×10 <sup>5</sup>       | 5×10 <sup>5</sup>       |
| Q <sub>x</sub> | 8.03±1.4 <sup>a</sup> | 28.9±3.1 <sup>b</sup>  | 97.5±14.7 <sup>c</sup> | 15.8±5.7 <sup>a</sup>  | 28.2±8.9 <sup>b</sup>   | 37.4±13.8 <sup>b</sup>  |
| O <sub>x</sub> | 6.0±0.85 <sup>a</sup> | 50.9±4.4 <sup>e</sup>  | 63.3±0.7 <sup>f</sup>  | 108.9±7.3 <sup>g</sup> | 108.5±39.5 <sup>g</sup> | 120.2±42.5 <sup>g</sup> |
| H <sub>x</sub> | 3.6±0.06 <sup>a</sup> | 59.2±5.6 <sup>ef</sup> | 86.5±0.02 <sup>g</sup> | 96±9.7 <sup>g</sup>    | 97.1±24.4 <sup>g</sup>  | 117.6±34.4 <sup>g</sup> |

The data of  $\Delta f$  are exhibited as the mean ± standard deviation (SD). For each treatment in the table, means in each column not sharing the same lowercase letters are significantly different ( $P \leq 0.05$ ), while means in each column sharing the same lowercase letters are not significantly different ( $P > 0.05$ ).

**Supplementary Table S2.** ANOVA results for the effect of y-polarized order modes and cells concentration on the measured responses of  $\Delta f$ .

| Variable       | Treatment (cells/ml)  |                       |                       |                         |                        |                        |
|----------------|-----------------------|-----------------------|-----------------------|-------------------------|------------------------|------------------------|
|                | 1×10 <sup>4</sup>     | 3×10 <sup>4</sup>     | 5×10 <sup>4</sup>     | 1×10 <sup>5</sup>       | 3×10 <sup>5</sup>      | 5×10 <sup>5</sup>      |
| Q <sub>y</sub> | 0±15.6 <sup>a</sup>   | 18.6±3.4 <sup>b</sup> | 42.7±2.9 <sup>c</sup> | 126.3±14.1 <sup>d</sup> | 36.7±7.0 <sup>c</sup>  | -8.75±0.7 <sup>a</sup> |
| O <sub>y</sub> | -0.5±8.9 <sup>a</sup> | 33.4±4.3 <sup>c</sup> | 63.7±9.6 <sup>e</sup> | 107.4±5.8 <sup>d</sup>  | 17.2±15.1 <sup>b</sup> | 32.6±13.4 <sup>c</sup> |

**Supplementary Table S3.** Fitting results for x-polarized order modes using above mentioned empirical model with the different refractive index

| Variable       | constants |                 |                       |                       |
|----------------|-----------|-----------------|-----------------------|-----------------------|
| Orders mode    | $w$       | $\varepsilon_f$ | $h_{cell}(m)$         | $l_{field}(m)$        |
| Q <sub>x</sub> | 38.90     | -2.7775         | 5.00×10 <sup>-6</sup> | 1.50×10 <sup>-5</sup> |
| O <sub>x</sub> | 107.05    | -1.3195         | 5.00×10 <sup>-6</sup> | 1.50×10 <sup>-5</sup> |
| H <sub>x</sub> | 95.15     | 0.7508          | 5.00×10 <sup>-6</sup> | 1.50×10 <sup>-5</sup> |
